# Supplementary material
Source: publisher figshare collection journal article supplement (https://future-science-group.figshare.com/ndownloader/files/27909969)
Supplement: Supplementary file 1 [file 27909969]

**Supplementary Table 2.** Genital and urinary tract infections†.

| **Outcome** | **Sitagliptin**  **n=427** | **Dapagliflozin**  **n=514** |
| --- | --- | --- |
| Genital infection | 0 (0%) | 34 (6.6%) |
| Urinary tract infection | 2 (0.5%) | 13 (2.5%) |
| †Data presented as number of patients (%). | | |
